# Supplementary material
Source: Research Square preprint supplement (doi:10.21203/rs.3.rs-9070095/v1)
Supplement: Supplementary file 1 [file 289b8c02d5058388f18cb3b1.docx]

**Appendix A:**

**Table A.1 Detailed Content of the Corpus**

| **Source** | **Register** | **Strategy** | **Model** | **TOTAL** |
| --- | --- | --- | --- | --- |
| TOTAL |  |  |  | 8000 (7757024) |
|  |  |  |  |  |
| Human | Science |  |  | 125 (146994) |
|  | Social Sciences |  |  | 125 (97723) |
|  | Humanities |  |  | 125 (76685) |
|  | Engineering |  |  | 125 (237696) |
|  |  |  |  |  |
| AI | Science | Zero-shot | ChatGPT | 125 (152811) |
|  |  |  | Grok | 125 (172326) |
|  |  |  | Gemini | 125 (89913) |
|  |  |  | Qwen | 125 (91138) |
|  |  |  | Deepseek | 125 (135726) |
|  |  | Few-shot | ChatGPT | 125 (130512) |
|  |  |  | Grok | 125 (137935) |
|  |  |  | Gemini | 125 (125807) |
|  |  |  | Qwen | 125 (118313) |
|  |  |  | Deepseek | 124 (116973) |
|  |  | Multi-strategy | ChatGPT | 125 (130852) |
|  |  |  | Grok | 125 (109139) |
|  |  |  | Gemini | 125 (116558) |
|  |  |  | Qwen | 125 (107941) |
|  |  |  | Deepseek | 125 (118474) |
|  | Social Sciences | Zero-shot | ChatGPT | 125 (172068) |
|  |  |  | Grok | 125 (178696) |
|  |  |  | Gemini | 125 (65937) |
|  |  |  | Qwen | 125 (85276) |
|  |  |  | Deepseek | 125 (129290) |
|  |  | Few-shot | ChatGPT | 125 (119667) |
|  |  |  | Grok | 125 (92191) |
|  |  |  | Gemini | 125 (99020) |
|  |  |  | Qwen | 125 (93883) |
|  |  |  | Deepseek | 125 (92524) |
|  |  | Multi-strategy | ChatGPT | 125 (127539) |
|  |  |  | Grok | 125 (90603) |
|  |  |  | Gemini | 125 (102935) |
|  |  |  | Qwen | 125 (87959) |
|  |  |  | Deepseek | 125 (101325) |
|  | Humanities | Zero-shot | ChatGPT | 125 (159947) |
|  |  |  | Grok | 125 (178884) |
|  |  |  | Gemini | 125 (65372) |
|  |  |  | Qwen | 125 (93654) |
|  |  |  | Deepseek | 125 (149996) |
|  |  | Few-shot | ChatGPT | 125 (120686) |
|  |  |  | Grok | 125 (87923) |
|  |  |  | Gemini | 125 (100364) |
|  |  |  | Qwen | 125 (98949) |
|  |  |  | Deepseek | 125 (100420) |
|  |  | Multi-strategy | ChatGPT | 125 (112861) |
|  |  |  | Grok | 125 (99209) |
|  |  |  | Gemini | 125 (105877) |
|  |  |  | Qwen | 125 (97980) |
|  |  |  | Deepseek | 125 (107697) |
|  | Engineering | Zero-shot | ChatGPT | 125 (169789) |
|  |  |  | Grok | 125 (171599) |
|  |  |  | Gemini | 125 (88188) |
|  |  |  | Qwen | 125 (96977) |
|  |  |  | Deepseek | 125 (144529) |
|  |  | Few-shot | ChatGPT | 125 (143365) |
|  |  |  | Grok | 125 (185028) |
|  |  |  | Gemini | 125 (136704) |
|  |  |  | Qwen | 125 (154849) |
|  |  |  | Deepseek | 126 (130268) |
|  |  | Multi-strategy | ChatGPT | 125 (132885) |
|  |  |  | Grok | 125 (114921) |
|  |  |  | Gemini | 125 (118516) |
|  |  |  | Qwen | 125 (111553) |
|  |  |  | Deepseek | 125 (125605) |

**Appendix B**

**Table B.1 Prompt Template**

| **Prompt** | **Content** |
| --- | --- |
| Zero-shot | Please generate a Chinese-language academic introduction based on the following paper title:“{title}”. Introduction: |
|  |  |
| Few-shot | You are a professional academic writing assistant. Based on the research topic provided by the user, compose a well-structured, logically rigorous, and stylistically appropriate Chinese introduction for an academic paper. {few_shot_examples_text} Now, please generate the introduction according to the following information: Research Topic: “{current_title}” Introduction: |
|  |  |
| Multi-strategy Prompting | You are a scholar with extensive experience in academic research and writing, skilled in producing scholarly texts in Chinese with professional rigor. Core Task Write a Chinese-language introduction for an academic paper centered on the following research topic. The text should: • Appear as if authored by an experienced, seasoned scholar; • Emulate the statistical characteristics of human academic writing: maintain low perplexity (i.e., natural word choice and contextual appropriateness), while allowing for reasonable variability—such as occasional parenthetical remarks, emphatic transitions, or moderately complex compound sentences—without sounding abrupt or disjointed. Content Guidance (Non-prescriptive Structure) Introductions typically begin with a real-world context or theoretical tension and gradually lead to the research question. You may consider addressing: – Why this topic merits renewed attention at this moment; – What gaps or underexplored dimensions remain in prior scholarship (no need for exhaustive citations—generalized references are acceptable); – How this study seeks to advance understanding through a novel perspective, methodology, or data. However, do not rigidly follow a fixed template like “background → literature review → gap → contribution.” You are encouraged to organize your argument more organically—for instance, starting from a paradox, a case example, or even a probing question. {few_shot_examples_text} Style and Rhythm Requirements – Use formal yet flexible academic Chinese; – Vary sentence length naturally: include both concise assertions and longer sentences that convey complex logic, while ensuring readability; – Maintain high informational density throughout the paragraph; – Avoid mechanical structural markers; instead, rely on semantic cohesion and implicit logical transitions. Post-Generation Self-Check After drafting, reread your text as a critical reader and ask: → Does it read like the opening of a genuine journal article? → Are there any overly smooth but vacuous sentences? → Is there any point where the writing suddenly feels “non-human”—for example, due to excessive jargon, abrupt logical leaps, or lack of transitional buffering? If so, refine the text until it achieves a natural, authentic scholarly tone. Now, please generate the introduction based on the following topic: Research Topic: “{current_title}” Introduction: |

**Appendix C**

**Table C.1 Linguistic features**

| **Category** | **Linguistic features** |
| --- | --- |
| 1. Pronouns & Deictics | Demonstrative Pronouns |
|  | First-person Pronouns |
|  | Indefinite Pronouns |
|  | Third-person Pronouns |
|  | Inanimate Pronouns |
|  | Second-person Pronouns |
|  | Interrogative Pronouns |
|  | First-person Pronoun "Wo" |
|  | Plural Personal Pronouns |
| 2. Verbs & Modality | Mental Verbs |
|  | Speculative Verbs |
|  | Assertive Verbs |
|  | Communicative Verbs |
|  | Causative Verbs |
|  | Existential Verbs |
|  | Copula "Shi" |
|  | Directional Verbs |
|  | High-frequency Verbs |
|  | Mid-frequency Verbs |
|  | Low-frequency Verbs |
|  | Modal Verbs of Necessity |
|  | Modal Verbs of Possibility |
| 3. Nouns & Lexical Semantics | Abstract Nouns |
|  | Propositional Nouns |
|  | Academic Discipline Classifiers |
|  | Psychological Nouns |
|  | Concrete Techno-scientific Nouns |
|  | Nouns of Weights and Measures |
|  | High-frequency Nouns |
|  | Mid-frequency Nouns |
|  | Low-frequency Nouns |
|  | Locative Nouns |
|  | Directional Nouns |
|  | Generic Human Nouns |
|  | Collective Nouns |
|  | Plural Common Nouns |
| 4. Adverbs & Hedges | Temporal Adverbs |
|  | Adverbs of Inevitability |
|  | Adverbs of Possibility |
|  | Attitudinal Adverbs |
|  | High-frequency Adverbs |
|  | Mid-frequency Adverbs |
|  | Low-frequency Adverbs |
|  | Adverbs of Degree |
|  | Negation Words |
|  | Hedges |
| 5. Adjectives & Stylistic Features | High-frequency Adjectives |
|  | Mid-frequency Adjectives |
|  | Low-frequency Adjectives |
|  | Colloquialisms |
|  | Parentheticals |
|  | Er-hua (Retroflex Suffixation) |
|  | Bound Monosyllabic Words |
|  | Coupled Disyllabic Words |
|  | Archaic Words |
|  | Idioms (Chengyu) |
|  | Abbreviations |
|  | Onomatopoeia |
| 6. Adpositions & Connectives | Prepositions |
|  | Preposition "Ba" |
|  | Preposition "Bei" |
|  | Conjunctions |
|  | Coordinating Conjunctions |
|  | Prepositions of Time, Place, and Direction |
|  | Prepositions of Basis, Manner, Tool, and Comparison |
|  | Prepositions of Cause and Purpose |
|  | Prepositions of Agent and Patient |
|  | Prepositions of Concern and Object |
| 7. Particles & Numerals | Structural Particle "De1" (的) |
|  | Structural Particle "De2" (地) |
|  | Structural Particle "De3" (得) |
|  | Comparative Particles |
|  | Aspectual Particles |
|  | Tentative Particles |
|  | Temporal Particles |
|  | Approximate Particles |
|  | Other Particles |
|  | Modal Particles |
|  | Response Markers |
|  | Numerals |
|  | Numeral-Classifier Compounds |
|  | Measure Words |
|  | Ordinal Numbers |
| 8. Syntax & Clause Types | Progressive Constructions |
|  | Past-tense Constructions |
|  | Nominalization |
|  | Adversative Compound Sentences |
|  | Purpose Compound Sentences |
|  | Causal Compound Sentences |
|  | Hypothetical Compound Sentences |
|  | Conditional Compound Sentences |
|  | Progressive Compound Sentences |
|  | Alternative Compound Sentences |
|  | Successive Compound Sentences |
|  | Coordinate Compound Sentences |
|  | Explanatory Compound Sentences |
| 9. Metrics & Punctuation | Essential Punctuation: Question Marks |
|  | Essential Punctuation: Exclamation Marks |
|  | Lexical Diversity |
|  | Average Word Length |
|  | Average Sentence Length (in words) |
|  | Character Richness |
|  | Hapax Legomena (Words occurring once) |
|  | Dis Legomena (Words occurring twice) |
|  | Monosyllabic Words |

**Appendix D**

**Statistical Table Corresponding to RQ1**

**Table D.1 Group Stats by Variable**

| **Variable** | **Group** | **N** | **Mean** | **Std. Deviation** |
| --- | --- | --- | --- | --- |
| Overall | AI | 7500 | 0.0026 | 0.1255 |
|  | Human | 500 | -0.0383 | 0.1906 |
| FAC1 | AI | 7500 | 0.0055 | 0.4624 |
|  | Human | 500 | -0.0824 | 0.456 |
| FAC2 | AI | 7500 | 0.0027 | 0.2998 |
|  | Human | 500 | -0.0406 | 0.3013 |
| FAC3 | AI | 7500 | 0.0079 | 0.2824 |
|  | Human | 500 | -0.1188 | 0.2188 |
| FAC4 | AI | 7500 | -0.0059 | 0.2233 |
|  | Human | 500 | 0.0886 | 0.1863 |

**Table D.2 *t*-Test Results**

| **Variable** | **Levene Sig.** | **Assumption** | ***t*-value** | ***df*** | **Sig. (2-tailed)** | **Cohen's *d*** |
| --- | --- | --- | --- | --- | --- | --- |
| Overall | 0 | Welch's (Unequal Var.) | 4.727 | 529.3 | 0.0000 | 0.253 |
| FAC1 | 0 | Welch's (Unequal Var.) | 4.173 | 570.75 | 0.0000 | 0.191 |
| FAC2 | 0 | Welch's (Unequal Var.) | 3.113 | 568.04 | 0.0019 | 0.144 |
| FAC3 | 0.485 | Equal Var. | 9.848 | 8000 | 0.0000 | 0.502 |
| FAC4 | 0.002 | Welch's (Unequal Var.) | -10.852 | 600.05 | 0.0000 | -0.46 |

**Appendix E**

**Statistical Table Corresponding to RQ2**

**Table E.1 ANOVA Results**

|  | **Sum sq** | ***df*** | ***F*** | **PR(>F)** | **DV** |
| --- | --- | --- | --- | --- | --- |
| C(Source) | 3.628954049 | 1 | 18.23562037 | 1.97448E-05 | FAC1 |
| C(Register) | 96.94276673 | 3 | 162.3802587 | 3.5123E-102 | FAC1 |
| C(Source):C(Register) | 20.24862286 | 3 | 33.91667815 | 8.94706E-22 | FAC1 |
| Residual | 1593.421802 | 8000 |  |  | FAC1 |
| C(Source) | 0.879120929 | 1 | 10.0167187 | 0.001557066 | FAC2 |
| C(Register) | 11.21465367 | 3 | 42.59331775 | 2.67388E-27 | FAC2 |
| C(Source):C(Register) | 6.821835575 | 3 | 25.9093699 | 1.13138E-16 | FAC2 |
| Residual | 702.7372422 | 8000 |  |  | FAC2 |
| C(Source) | 7.540266383 | 1 | 100.430852 | 1.6859E-23 | FAC3 |
| C(Register) | 19.19967155 | 3 | 85.24187667 | 2.74744E-54 | FAC3 |
| C(Source):C(Register) | 2.600137424 | 3 | 11.5439784 | 1.5094E-07 | FAC3 |
| Residual | 601.1590237 | 8000 |  |  | FAC3 |
| C(Source) | 4.197074798 | 1 | 87.40377212 | 1.1273E-20 | FAC4 |
| C(Register) | 7.255908726 | 3 | 50.36792078 | 3.05071E-32 | FAC4 |
| C(Source):C(Register) | 0.218323535 | 3 | 1.515523817 | 0.208261832 | FAC4 |
| Residual | 384.4911621 | 8000 |  |  | FAC4 |
| C(Source) | 0.783169273 | 1 | 51.68919251 | 7.08768E-13 | Overall |
| C(Register) | 12.95476214 | 3 | 285.00488 | 8.7435E-176 | Overall |
| C(Source):C(Register) | 2.217065144 | 3 | 48.77545248 | 3.13421E-31 | Overall |
| Residual | 121.3181338 | 8000 |  |  | Overall |

**Table E.2 Post-Hoc Comparisons**

| **group1** | **group2** | **Mean-diff** | ***p*-adj** | **lower** | **upper** | **reject** | **Variable** |
| --- | --- | --- | --- | --- | --- | --- | --- |
| engineering | humanities | 0.0643 | 0 | 0.0278 | 0.1007 | TRUE | FAC1 |
| engineering | science | 0.0748 | 0 | 0.0382 | 0.1113 | TRUE | FAC1 |
| engineering | social_sci | -0.199 | 0 | -0.2355 | -0.1625 | TRUE | FAC1 |
| humanities | science | 0.0105 | 0.8816 | -0.026 | 0.0469 | FALSE | FAC1 |
| humanities | social_sci | -0.2633 | 0 | -0.2997 | -0.2269 | TRUE | FAC1 |
| science | social_sci | -0.2738 | 0 | -0.3103 | -0.2372 | TRUE | FAC1 |
| engineering | humanities | 0.0708 | 0 | 0.0467 | 0.095 | TRUE | FAC2 |
| engineering | science | 0.0465 | 0 | 0.0223 | 0.0707 | TRUE | FAC2 |
| engineering | social_sci | -0.0241 | 0.0514 | -0.0483 | 0.0001 | FALSE | FAC2 |
| humanities | science | -0.0243 | 0.0475 | -0.0485 | -0.0002 | TRUE | FAC2 |
| humanities | social_sci | -0.0949 | 0 | -0.1191 | -0.0708 | TRUE | FAC2 |
| science | social_sci | -0.0706 | 0 | -0.0948 | -0.0464 | TRUE | FAC2 |
| engineering | humanities | -0.127 | 0 | -0.1494 | -0.1046 | TRUE | FAC3 |
| engineering | science | -0.034 | 0.0006 | -0.0565 | -0.0116 | TRUE | FAC3 |
| engineering | social_sci | -0.0886 | 0 | -0.1111 | -0.0662 | TRUE | FAC3 |
| humanities | science | 0.093 | 0 | 0.0706 | 0.1154 | TRUE | FAC3 |
| humanities | social_sci | 0.0384 | 0.0001 | 0.016 | 0.0608 | TRUE | FAC3 |
| science | social_sci | -0.0546 | 0 | -0.0771 | -0.0322 | TRUE | FAC3 |
| engineering | humanities | -0.0183 | 0.0422 | -0.0362 | -0.0004 | TRUE | FAC4 |
| engineering | science | 0.0628 | 0 | 0.0449 | 0.0807 | TRUE | FAC4 |
| engineering | social_sci | 0.0167 | 0.0776 | -0.0012 | 0.0346 | FALSE | FAC4 |
| humanities | science | 0.0811 | 0 | 0.0632 | 0.099 | TRUE | FAC4 |
| humanities | social_sci | 0.035 | 0 | 0.0171 | 0.0529 | TRUE | FAC4 |
| science | social_sci | -0.0461 | 0 | -0.064 | -0.0282 | TRUE | FAC4 |
| engineering | humanities | -0.0026 | 0.9158 | -0.0127 | 0.0075 | FALSE | Overall |
| engineering | science | 0.0375 | 0 | 0.0274 | 0.0476 | TRUE | Overall |
| engineering | social_sci | -0.0738 | 0 | -0.0839 | -0.0636 | TRUE | Overall |
| humanities | science | 0.0401 | 0 | 0.03 | 0.0502 | TRUE | Overall |
| humanities | social_sci | -0.0712 | 0 | -0.0813 | -0.0611 | TRUE | Overall |
| science | social_sci | -0.1113 | 0 | -0.1214 | -0.1011 | TRUE | Overall |

**Appendix F**

**Statistical Table Corresponding to RQ3**

**Table F.1 ANOVA Results**

|  | **sum sq** | ***df*** | ***F*** | **PR(>F)** | **DV** |
| --- | --- | --- | --- | --- | --- |
| C(Model) | 32.4638109 | 4 | 40.70810333 | 8.44514E-34 | FAC1 |
| C(Prompt) | 52.90863724 | 2 | 132.6899222 | 2.34276E-57 | FAC1 |
| C(Model):C(Prompt) | 26.20312788 | 8 | 16.42874955 | 2.40115E-24 | FAC1 |
| Residual | 1495.071608 | 7500 |  |  | FAC1 |
| C(Model) | 48.36075773 | 4 | 151.809113 | 4.5424E-125 | FAC2 |
| C(Prompt) | 7.220110062 | 2 | 45.32925272 | 2.70273E-20 | FAC2 |
| C(Model):C(Prompt) | 22.58316886 | 8 | 35.44537962 | 1.58115E-55 | FAC2 |
| Residual | 597.2258763 | 7500 |  |  | FAC2 |
| C(Model) | 16.89123383 | 4 | 61.16782342 | 6.25024E-51 | FAC3 |
| C(Prompt) | 53.12846011 | 2 | 384.7856586 | 8.3081E-160 | FAC3 |
| C(Model):C(Prompt) | 11.2979947 | 8 | 20.45657979 | 6.23164E-31 | FAC3 |
| Residual | 517.7042251 | 7500 |  |  | FAC3 |
| C(Model) | 8.683562221 | 4 | 47.5594843 | 1.50551E-39 | FAC4 |
| C(Prompt) | 15.6413599 | 2 | 171.3340658 | 1.74004E-73 | FAC4 |
| C(Model):C(Prompt) | 7.997216625 | 8 | 21.90019999 | 2.67921E-33 | FAC4 |
| Residual | 342.2978301 | 7500 |  |  | FAC4 |

**Table F.2 Post-Hoc Comparisons**

| **group1** | **group2** | **Mean-diff** | ***p*-adj** | **lower** | **upper** | **reject** | **Factor** | **Variable** |
| --- | --- | --- | --- | --- | --- | --- | --- | --- |
| deepseek | gemini | -0.0594 | 0.0035 | -0.1049 | -0.0138 | TRUE | FAC1 | Model |
| deepseek | gpt | -0.023 | 0.6421 | -0.0686 | 0.0226 | FALSE | FAC1 | Model |
| deepseek | grok | 0.1331 | 0 | 0.0875 | 0.1787 | TRUE | FAC1 | Model |
| deepseek | qwen | -0.0117 | 0.9559 | -0.0573 | 0.0338 | FALSE | FAC1 | Model |
| gemini | gpt | 0.0363 | 0.1889 | -0.0092 | 0.0819 | FALSE | FAC1 | Model |
| gemini | grok | 0.1924 | 0 | 0.1469 | 0.238 | TRUE | FAC1 | Model |
| gemini | qwen | 0.0476 | 0.0354 | 0.002 | 0.0932 | TRUE | FAC1 | Model |
| gpt | grok | 0.1561 | 0 | 0.1105 | 0.2017 | TRUE | FAC1 | Model |
| gpt | qwen | 0.0113 | 0.9619 | -0.0343 | 0.0568 | FALSE | FAC1 | Model |
| grok | qwen | -0.1448 | 0 | -0.1904 | -0.0993 | TRUE | FAC1 | Model |
| few-shot | multi | -0.1952 | 0 | -0.2253 | -0.1651 | TRUE | FAC1 | Prompt |
| few-shot | zero-shot | -0.0418 | 0.0033 | -0.072 | -0.0117 | TRUE | FAC1 | Prompt |
| multi | zero-shot | 0.1534 | 0 | 0.1232 | 0.1835 | TRUE | FAC1 | Prompt |
| deepseek | gemini | -0.0039 | 0.9961 | -0.0327 | 0.0249 | FALSE | FAC2 | Model |
| deepseek | gpt | -0.1851 | 0 | -0.2139 | -0.1563 | TRUE | FAC2 | Model |
| deepseek | grok | -0.0466 | 0.0001 | -0.0753 | -0.0178 | TRUE | FAC2 | Model |
| deepseek | qwen | -0.1684 | 0 | -0.1972 | -0.1397 | TRUE | FAC2 | Model |
| gemini | gpt | -0.1812 | 0 | -0.21 | -0.1525 | TRUE | FAC2 | Model |
| gemini | grok | -0.0427 | 0.0005 | -0.0714 | -0.0139 | TRUE | FAC2 | Model |
| gemini | qwen | -0.1646 | 0 | -0.1933 | -0.1358 | TRUE | FAC2 | Model |
| gpt | grok | 0.1385 | 0 | 0.1098 | 0.1673 | TRUE | FAC2 | Model |
| gpt | qwen | 0.0167 | 0.5103 | -0.0121 | 0.0454 | FALSE | FAC2 | Model |
| grok | qwen | -0.1219 | 0 | -0.1506 | -0.0931 | TRUE | FAC2 | Model |
| few-shot | multi | -0.0708 | 0 | -0.0906 | -0.0511 | TRUE | FAC2 | Prompt |
| few-shot | zero-shot | -0.0117 | 0.3441 | -0.0315 | 0.008 | FALSE | FAC2 | Prompt |
| multi | zero-shot | 0.0591 | 0 | 0.0393 | 0.0788 | TRUE | FAC2 | Prompt |
| deepseek | gemini | -0.0788 | 0 | -0.1065 | -0.0511 | TRUE | FAC3 | Model |
| deepseek | gpt | 0.0468 | 0 | 0.0191 | 0.0746 | TRUE | FAC3 | Model |
| deepseek | grok | -0.011 | 0.8178 | -0.0387 | 0.0168 | FALSE | FAC3 | Model |
| deepseek | qwen | 0.0522 | 0 | 0.0245 | 0.08 | TRUE | FAC3 | Model |
| gemini | gpt | 0.1257 | 0 | 0.0979 | 0.1534 | TRUE | FAC3 | Model |
| gemini | grok | 0.0679 | 0 | 0.0401 | 0.0956 | TRUE | FAC3 | Model |
| gemini | qwen | 0.1311 | 0 | 0.1033 | 0.1588 | TRUE | FAC3 | Model |
| gpt | grok | -0.0578 | 0 | -0.0855 | -0.0301 | TRUE | FAC3 | Model |
| gpt | qwen | 0.0054 | 0.9841 | -0.0223 | 0.0331 | FALSE | FAC3 | Model |
| grok | qwen | 0.0632 | 0 | 0.0355 | 0.0909 | TRUE | FAC3 | Model |
| few-shot | multi | 0.1786 | 0 | 0.1608 | 0.1965 | TRUE | FAC3 | Prompt |
| few-shot | zero-shot | 0.0005 | 0.9977 | -0.0174 | 0.0183 | FALSE | FAC3 | Prompt |
| multi | zero-shot | -0.1781 | 0 | -0.196 | -0.1603 | TRUE | FAC3 | Prompt |
| deepseek | gemini | -0.0103 | 0.7059 | -0.0323 | 0.0117 | FALSE | FAC4 | Model |
| deepseek | gpt | -0.0877 | 0 | -0.1096 | -0.0657 | TRUE | FAC4 | Model |
| deepseek | grok | -0.042 | 0 | -0.0639 | -0.02 | TRUE | FAC4 | Model |
| deepseek | qwen | 0.0024 | 0.9982 | -0.0195 | 0.0244 | FALSE | FAC4 | Model |
| gemini | gpt | -0.0774 | 0 | -0.0993 | -0.0554 | TRUE | FAC4 | Model |
| gemini | grok | -0.0317 | 0.0008 | -0.0537 | -0.0097 | TRUE | FAC4 | Model |
| gemini | qwen | 0.0127 | 0.5117 | -0.0093 | 0.0347 | FALSE | FAC4 | Model |
| gpt | grok | 0.0457 | 0 | 0.0237 | 0.0677 | TRUE | FAC4 | Model |
| gpt | qwen | 0.0901 | 0 | 0.0681 | 0.1121 | TRUE | FAC4 | Model |
| grok | qwen | 0.0444 | 0 | 0.0224 | 0.0664 | TRUE | FAC4 | Model |
| few-shot | multi | -0.099 | 0 | -0.1135 | -0.0845 | TRUE | FAC4 | Prompt |
| few-shot | zero-shot | -0.0045 | 0.7419 | -0.019 | 0.0099 | FALSE | FAC4 | Prompt |
| multi | zero-shot | 0.0944 | 0 | 0.0799 | 0.1089 | TRUE | FAC4 | Prompt |
